# Supplementary material for: Visible Foliar Injury and Ecophysiological Responses to Ozone and Drought in Oak Seedlings
Source: MDPI journal article supplement (doi:10.3390/plants11141836), 2022-07-13
Supplement: s1 [file s1]

## **Visible foliar injury and ecophysiological responses to ozone and drought in oak seedlings**

Bárbara Baesso Moura<sup>1</sup>, Elena Paoletti<sup>1\*</sup>, Ovidiu Badea<sup>2,3</sup>, Francesco Ferrini<sup>4</sup> and Yasutomo Hoshika<sup>1</sup>

1. Institute of Research on Terrestrial Ecosystems (IRET), National Research Council of Italy (CNR), Via Madonna del Piano 10, 50019 Sesto Fiorentino, Italy.

2. "Marin Drăcea" National Institute for Research and Development in Forestry 128 Eroilor Blvd., Voluntari 077190, Ilfov, Romania

3. "Transilvania" University, Faculty of Silviculture and Forest Engineering, 1, Ludwig van Beethoven Str., Braşov 500123, Braşov, Romania

4. Department of Agriculture, Food, Environmental and Forestry Sciences, Section Woody Plants, University of Florence, 50019 Sesto Fiorentino, Italy.

\* corresponding author: elena.paoletti@cnr.it

**Supplementary material**

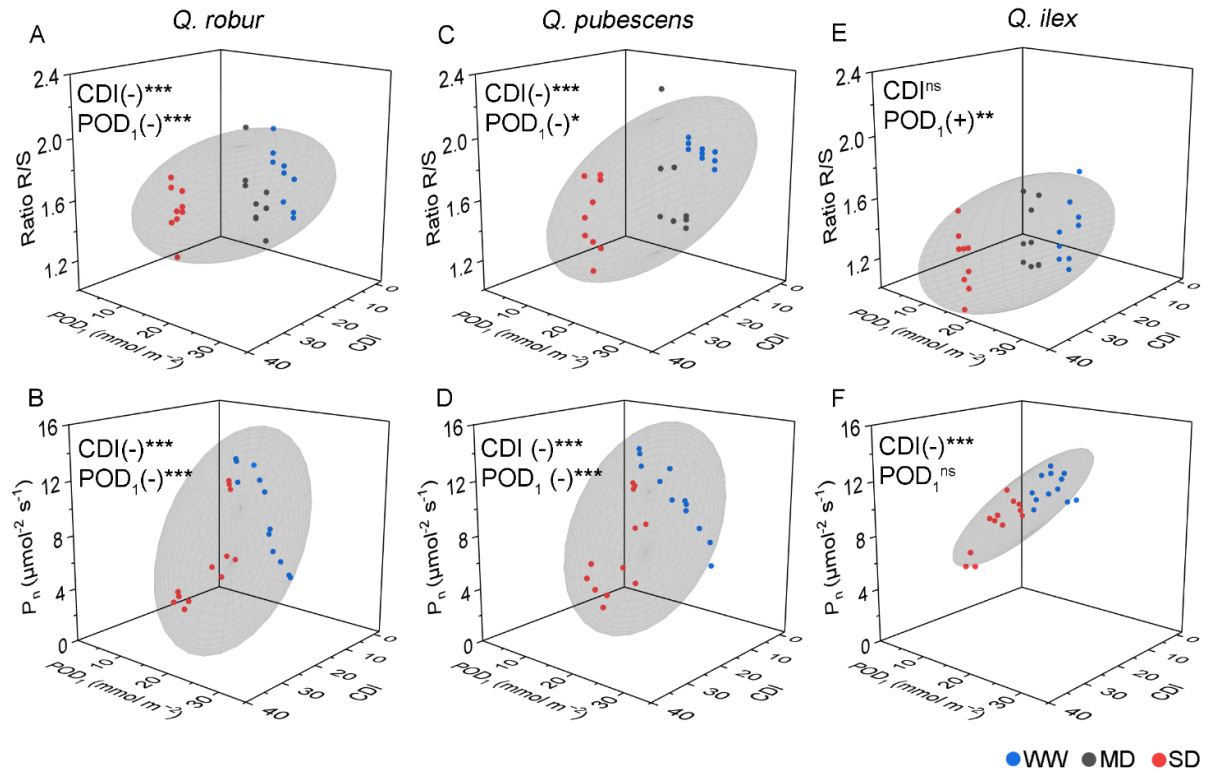

Figure S1. Results of the multiple linear regression, considering Cumulative Drought Index (CDI) and phototoxic O<sub>3</sub> dose (POD<sub>1</sub>) as predictor factors, and shoot/root (Ratio R/S) and Photosynthesis (P<sub>n</sub>) as dependent parameters. Colored dots represent well-watered (WW - blue), moderate drought (MD - grey) and severe drought (SD - red). Grey ellipsoids represent a confidence level of 75%. (+) positive regression, (-) negative regression, \* =  $p < 0.05$ , \*\* =  $p < 0.01$ , \*\*\* =  $p < 0.001$ , ns = not significant.

Table S1. Growth parameters for the species *Q. robur*, *Q. pubescens*, and *Q. ilex*: Plant height increment (cm), Stem diameter increment (cm), and leaf number increment (N. leaves - n). Biomass parameters: Leaf (g), Shoot (g), Root (g), Total biomass (g), and shoot/root (Ratio R/S). Values are the means  $\pm$  SE in the different O<sub>3</sub> (AA,  $\times 1.2$ ,  $\times 1.4$ ) and drought (WW, MD, SD) treatments.

| Species             | Parameter |           | AA               |                  |                  | $\times 1.2$     |                  |                  | $\times 1.4$     |                   |                   |
|---------------------|-----------|-----------|------------------|------------------|------------------|------------------|------------------|------------------|------------------|-------------------|-------------------|
|                     |           |           | WW-treated       | MD-treated       | SD-treated       | WW-treated       | MD-treated       | SD-treated       | WW-treated       | MD-treated        | SD-treated        |
| <i>Q. ilex</i>      | Growth    | Height    | 16.06 $\pm$ 1.67 | 17.39 $\pm$ 2.08 | 15.94 $\pm$ 2.51 | 18.33 $\pm$ 3.61 | 15.50 $\pm$ 1.42 | 14.50 $\pm$ 2.75 | 16.33 $\pm$ 2.50 | 17.33 $\pm$ 3.06  | 18.39 $\pm$ 2.36  |
|                     |           | Diameter  | 2.16 $\pm$ 0.39  | 2.31 $\pm$ 0.26  | 2.37 $\pm$ 0.64  | 3.48 $\pm$ 0.24  | 2.28 $\pm$ 0.42  | 2.06 $\pm$ 0.37  | 2.77 $\pm$ 0.50  | 2.32 $\pm$ 0.43   | 3.32 $\pm$ 0.36   |
|                     |           | N. leaves | 42.1 $\pm$ 8.23  | 57.3 $\pm$ 6.57  | 47.2 $\pm$ 9.56  | 59.3 $\pm$ 6.29  | 56.6 $\pm$ 1.71  | 72.7 $\pm$ 11.59 | 51.28 $\pm$ 6.32 | 85.50 $\pm$ 14.91 | 72.00 $\pm$ 13.28 |
|                     | Biomass   | Leaf      | 4.45 $\pm$ 0.18  | 4.04 $\pm$ 0.23  | 3.32 $\pm$ 0.18  | 4.04 $\pm$ 0.93  | 3.26 $\pm$ 0.64  | 5.04 $\pm$ 0.95  | 3.59 $\pm$ 0.47  | 4.36 $\pm$ 1.60   | 3.86 $\pm$ 0.11   |
|                     |           | Shoot     | 7.48 $\pm$ 0.61  | 7.82 $\pm$ 0.31  | 6.08 $\pm$ 0.20  | 8.48 $\pm$ 1.29  | 6.78 $\pm$ 0.75  | 6.58 $\pm$ 1.09  | 7.58 $\pm$ 0.05  | 6.90 $\pm$ 0.54   | 6.58 $\pm$ 0.57   |
|                     |           | Root      | 13.0 $\pm$ 0.78  | 12.4 $\pm$ 0.63  | 12.5 $\pm$ 0.95  | 12.5 $\pm$ 1.86  | 11.5 $\pm$ 0.69  | 10.9 $\pm$ 1.45  | 12.9 $\pm$ 0.91  | 12.2 $\pm$ 1.46   | 10.8 $\pm$ 0.68   |
|                     |           | Total     | 24.89 $\pm$ 0.26 | 24.22 $\pm$ 0.80 | 21.92 $\pm$ 0.54 | 25.06 $\pm$ 3.91 | 21.52 $\pm$ 2.05 | 22.52 $\pm$ 3.45 | 24.06 $\pm$ 1.35 | 23.45 $\pm$ 3.57  | 21.21 $\pm$ 1.15  |
|                     |           | Ratio R/S | 1.03 $\pm$ 0.03  | 1.04 $\pm$ 0.07  | 1.40 $\pm$ 0.26  | 1.02 $\pm$ 0.10  | 1.21 $\pm$ 0.05  | 0.96 $\pm$ 0.05  | 1.18 $\pm$ 0.05  | 1.11 $\pm$ 0.08   | 1.08 $\pm$ 0.02   |
| <i>Q. pubescens</i> | Growth    | Height    | 2.45 $\pm$ 0.2   | 2.18 $\pm$ 0.42  | 2.73 $\pm$ 0.25  | 2.42 $\pm$ 1.34  | 3.94 $\pm$ 0.77  | 3.15 $\pm$ 0.21  | 6.72 $\pm$ 1.15  | 5.13 $\pm$ 0.81   | 1.5 $\pm$ 0.36    |
|                     |           | Diameter  | 5.82 $\pm$ 0.77  | 4.26 $\pm$ 0.7   | 5.04 $\pm$ 0.51  | 5.57 $\pm$ 0.28  | 5.31 $\pm$ 0.71  | 5.08 $\pm$ 0.62  | 4.79 $\pm$ 0.38  | 4.28 $\pm$ 0.61   | 4.88 $\pm$ 0.54   |
|                     |           | N. leaves | 88.3 $\pm$ 14.5  | 60.89 $\pm$ 7.75 | 74.67 $\pm$ 12.2 | 85.1 $\pm$ 4.86  | 120 $\pm$ 12.2   | 62.1 $\pm$ 0.92  | 39.8 $\pm$ 3.29  | 82.7 $\pm$ 16     | 59.8 $\pm$ 7.24   |
|                     | Biomass   | Leaf      | 3.43 $\pm$ 0.79  | 3.01 $\pm$ 0.59  | 3.65 $\pm$ 0.36  | 3.77 $\pm$ 0.09  | 4.48 $\pm$ 0.85  | 3.29 $\pm$ 0.71  | 3.04 $\pm$ 0.29  | 5.23 $\pm$ 1.12   | 3.59 $\pm$ 0.32   |
|                     |           | Shoot     | 9.84 $\pm$ 0.81  | 9.17 $\pm$ 1.36  | 7.19 $\pm$ 0.23  | 8.17 $\pm$ 0.25  | 9.37 $\pm$ 0.49  | 7.92 $\pm$ 0.51  | 9.02 $\pm$ 1.10  | 8.28 $\pm$ 0.88   | 6.64 $\pm$ 0.47   |
|                     |           | Root      | 21.6 $\pm$ 1.16  | 20.9 $\pm$ 1.29  | 16.4 $\pm$ 1.98  | 19.3 $\pm$ 0.80  | 20.9 $\pm$ 0.74  | 14.5 $\pm$ 0.81  | 21.9 $\pm$ 2.70  | 18.6 $\pm$ 2.52   | 16.4 $\pm$ 2.51   |
|                     |           | Total     | 35.1 $\pm$ 0.97  | 33.1 $\pm$ 1.87  | 27.2 $\pm$ 2.47  | 31.6 $\pm$ 0.34  | 34.7 $\pm$ 1.19  | 25.7 $\pm$ 1.76  | 33.9 $\pm$ 3.91  | 32.1 $\pm$ 4.37   | 26.6 $\pm$ 3.23   |
|                     |           | Ratio R/S | 1.82 $\pm$ 0.04  | 1.77 $\pm$ 0.44  | 1.5 $\pm$ 0.21   | 1.77 $\pm$ 0.03  | 1.48 $\pm$ 0.21  | 1.32 $\pm$ 0.23  | 1.74 $\pm$ 0.06  | 1.38 $\pm$ 0.04   | 1.59 $\pm$ 0.27   |
| <i>Q. robur</i>     | Growth    | Height    | 2.78 $\pm$ 1.8   | 2.52 $\pm$ 0.69  | 1.6 $\pm$ 0.61   | 2.35 $\pm$ 0.63  | 3 $\pm$ 1.5      | 2.03 $\pm$ 0.57  | 5.48 $\pm$ 1.77  | 6.2 $\pm$ 0.61    | 4.67 $\pm$ 1.76   |
|                     |           | Diameter  | 5.62 $\pm$ 0.55  | 4.3 $\pm$ 1.2    | 5.06 $\pm$ 0.52  | 6.18 $\pm$ 0.55  | 4.79 $\pm$ 0.71  | 3.29 $\pm$ 0.37  | 5.76 $\pm$ 0.41  | 5.73 $\pm$ 0.42   | 4.64 $\pm$ 0.65   |
|                     |           | N. leaves | 187 $\pm$ 26.8   | 166 $\pm$ 17.3   | 134 $\pm$ 11.1   | 190 $\pm$ 17.8   | 166 $\pm$ 4.86   | 143 $\pm$ 17.5   | 177 $\pm$ 13.9   | 208 $\pm$ 35      | 117 $\pm$ 12      |
|                     | Biomass   | Leaf      | 4.93 $\pm$ 0.86  | 5.15 $\pm$ 0.51  | 4.58 $\pm$ 0.22  | 5.25 $\pm$ 0.67  | 5.46 $\pm$ 0.61  | 4.41 $\pm$ 0.46  | 6.17 $\pm$ 0.63  | 5.90 $\pm$ 1.55   | 3.93 $\pm$ 0.26   |
|                     |           | Shoot     | 12.5 $\pm$ 1.24  | 12.4 $\pm$ 2.46  | 7.71 $\pm$ 0.24  | 11.6 $\pm$ 1.86  | 10.4 $\pm$ 1.18  | 7.62 $\pm$ 0.50  | 10.6 $\pm$ 2.21  | 9.66 $\pm$ 2.12   | 7.21 $\pm$ 0.85   |
|                     |           | Root      | 29.2 $\pm$ 6.04  | 26.2 $\pm$ 2.32  | 19.8 $\pm$ 0.63  | 26.9 $\pm$ 3.59  | 21.9 $\pm$ 2.06  | 16.2 $\pm$ 1.50  | 25.3 $\pm$ 4.55  | 24.7 $\pm$ 4.74   | 18.8 $\pm$ 1.56   |
|                     |           | Total     | 46.6 $\pm$ 8.09  | 43.8 $\pm$ 4.94  | 32.1 $\pm$ 0.77  | 43.7 $\pm$ 6.05  | 37.8 $\pm$ 3.85  | 28.3 $\pm$ 1.69  | 42.0 $\pm$ 7.35  | 40.3 $\pm$ 8.15   | 29.9 $\pm$ 1.78   |
|                     |           | Ratio R/S | 1.78 $\pm$ 0.12  | 1.71 $\pm$ 0.22  | 1.58 $\pm$ 0.16  | 1.56 $\pm$ 0.14  | 1.39 $\pm$ 0.06  | 1.37 $\pm$ 0.17  | 1.42 $\pm$ 0.15  | 1.41 $\pm$ 0.17   | 1.55 $\pm$ 0.07   |
